# Supplementary material for: Evaluation of Different Recruitment Methods: Longitudinal, Web-Based, Pan-European Physical Activity Through Sustainable Transport Approaches (PASTA) Project
Source: PubMed Central journal article supplement (PMC6533046; doi:10.2196/11492), 2019-05-06
Supplement: jmir_v21i5e11492_app1.pdf [file jmir_v21i5e11492_app1.pdf]

**Table h: Demographic characteristic (gender) by recruitment strategy of participants compared with each City Census**

|                                            | Men (D <sup>a</sup> ) | Women (D)    | chi-squared <sup>b</sup> | P          |
|--------------------------------------------|-----------------------|--------------|--------------------------|------------|
| <b>Antwerp</b>                             |                       |              |                          |            |
| <b>City Census, 2017 (N = 393,975) %</b>   | <b>49.4</b>           | <b>50.6</b>  | -                        | -          |
| <b>Total Antwerp (N = 1,444) %</b>         | 47.6 (-1.8)           | 52.4 (1.8)   | 1.68                     | <b>.19</b> |
| Work (n = 376) %                           | 38.8 (-10.6)          | 61.2 (10.6)  | 16.34                    | < .001     |
| Word of mouth (n = 194) %                  | 50.0 (0.6)            | 50.0 (-0.6)  | 0.01                     | <b>.92</b> |
| Other organizations (n = 289) %            | 50.9 (1.5)            | 49.1 (-1.5)  | 0.20                     | <b>.66</b> |
| Project outreach activities (n = 132) %    | 59.1 (9.7)            | 40.9 (-9.7)  | 4.59                     | .03        |
| Media <sup>c</sup> (n = 409) %             | 48.4 (-1.0)           | 51.6 (1.0)   | 0.12                     | <b>.73</b> |
| News (n = 98) %                            | 55.1 (5.7)            | 44.9 (-5.7)  | 1.06                     | <b>.30</b> |
| Social media (n = 311) %                   | 46.3 (-3.1)           | 53.7 (3.1)   | 1.06                     | <b>.30</b> |
| <b>Barcelona</b>                           |                       |              |                          |            |
| <b>City Census, 2016 (N = 1,339,223)</b>   | <b>46.5</b>           | <b>53.5</b>  | -                        | -          |
| <b>Total Barcelona (N = 1,694) %</b>       | 41.1 (-5.4)           | 58.9 (5.4)   | 19.48                    | < .001     |
| Work (n = 198) %                           | 28.3 (-18.2)          | 71.7 (18.2)  | 25.76                    | < .001     |
| Word of mouth (n = 366) %                  | 41.3 (-5.2)           | 58.7 (5.2)   | 3.88                     | .05        |
| Other organizations (n = 105) %            | 41.0 (-5.5)           | 59.0 (5.5)   | 1.10                     | <b>.29</b> |
| Project outreach activities (n = 650) %    | 42.5 (-4.0)           | 57.5 (4.0)   | 4.15                     | .04        |
| Media (n = 257) %                          | 47.5 (1.0)            | 52.5 (-1.0)  | 0.06                     | <b>.81</b> |
| News (n = 40) %                            | 50.0 (3.5)            | 50.0 (-3.5)  | 0.08                     | <b>.78</b> |
| Social media (n = 217) %                   | 47.0 (0.5)            | 53.0 (-0.5)  | 0.01                     | <b>.94</b> |
| <b>London</b>                              |                       |              |                          |            |
| <b>City Census, 2015 (N = 6,533,667) %</b> | <b>49.2</b>           | <b>50.8</b>  | -                        | -          |
| <b>Total London (N = 1,431) %</b>          | 41.4 (-7.8)           | 58.6 (7.8)   | 34.05                    | < .001     |
| Work (n = 316) %                           | 37.7 (-11.5)          | 62.3 (11.5)  | 16.35                    | < .001     |
| Word of mouth (n = 140) %                  | 48.6 (-0.6)           | 51.4 (0.6)   | 0.004                    | <b>.96</b> |
| Other organizations (n = 281) %            | 42.3 (-6.9)           | 57.7 (6.9)   | 4.99                     | .03        |
| Project outreach activities (n = 196) %    | 44.4 (-4.8)           | 55.6 (4.8)   | 1.62                     | <b>.20</b> |
| Media (n = 351) %                          | 42.2 (-7.0)           | 57.8 (7.0)   | 6.65                     | .01        |
| News (n = 109) %                           | 46.8 (-2.4)           | 53.2 (2.4)   | 0.16                     | <b>.69</b> |
| Social media (n = 242) %                   | 40.1 (-9.1)           | 59.9 (9.0)   | 7.67                     | .01        |
| <b>Oerebro</b>                             |                       |              |                          |            |
| <b>City Census, 2016 (N = 112,173)</b>     | <b>48.8</b>           | <b>51.2</b>  | -                        | -          |
| <b>Total Oerebro (N = 1,395) %</b>         | 37.8 (-11.0)          | 62.2 (11.0)  | 65.40                    | < .001     |
| Work (n = 342) %                           | 34.5 (-14.3)          | 65.5 (14.3)  | 27.23                    | < .001     |
| Word of mouth (n = 15) %                   | 60 (11.2)             | 40 (-11.2)   | 0.37                     | <b>.54</b> |
| Other organizations (n = 36) %             | 50 (1.2)              | 50 (-1.2)    | < 0.001                  | <b>1</b>   |
| Project outreach activities (n = 547) %    | 35.1 (-13.7)          | 64.9 (13.7)  | 40.20                    | < .001     |
| Media (n = 84) %                           | 34.5 (-14.3)          | 65.5 (14.3)  | 6.26                     | .01        |
| News (n = 51) %                            | 37.3 (-11.5)          | 62.7 (11.5)  | 2.27                     | <b>.13</b> |
| Social media (n = 33) %                    | 30.3 (-18.5)          | 69.7 (18.5)  | 3.80                     | <b>.05</b> |
| Random sampling (n = 360) %                | 43.9 (-4.9)           | 56.1 (4.9)   | 3.24                     | <b>.07</b> |
| <b>Rome</b>                                |                       |              |                          |            |
| <b>City Census, 2011 (N = 2,150,368) %</b> | <b>46.0</b>           | <b>54.0</b>  | -                        | -          |
| <b>Total Rome (N = 1,836) %</b>            | 61.1 (15.1)           | 38.9 (-15.1) | 168.33                   | < .001     |
| Work (n = 337) %                           | 54.6 (8.6)            | 45.4 (-8.6)  | 9.72                     | .002       |
| Word of mouth (n = 244) %                  | 57.8 (11.8)           | 42.2(-11.8)  | 13.21                    | < .001     |
| Other organizations (n = 140) %            | 62.9 (16.9)           | 37.1 (-16.9) | 15.37                    | < .001     |
| Project outreach activities (n = 158) %    | 66.5 (20.5)           | 33.5 (-20.5) | 25.83                    | < .001     |
| Media (n = 780) %                          | 63.3 (17.3)           | 36.7 (-17.3) | 93.76                    | < .001     |
| News (N = 248) %                           | 57.7 (11.7)           | 42.3 (-11.7) | 13.14                    | < .001     |
| Social media (N = 89) %                    | 66.0 (20.0)           | 34.0 (-20.0) | 84.77                    | < .001     |
| Public notice <sup>d</sup> (N = 532) %     | 74.2 (28.2)           | 25.8 (-28.2) | 27.31                    | < .001     |

|                                            |              |              |         |            |
|--------------------------------------------|--------------|--------------|---------|------------|
| <b>Vienna</b>                              |              |              |         |            |
| <b>City Census, 2016 (N = 1,486,591) %</b> | <b>47.8</b>  | <b>52.2</b>  | -       | -          |
| <b>Total Vienna (N = 1,461) %</b>          | 46.4 (-1.4)  | 53.6 (1.4)   | 1.11    | <b>.29</b> |
| Work (N = 230) %                           | 35.2 (-12.6) | 64.8 (12.6)  | 14.13   | < .001     |
| Word of mouth (N = 154) %                  | 39.0 (-8.8)  | 61.0 (8.8)   | 4.49    | .034       |
| Other organizations (N = 314) %            | 59.2 (11.4)  | 40.8 (-11.4) | 15.95   | < .001     |
| Project outreach activities (N = 327) %    | 46.5 (-1.3)  | 53.5 (1.3)   | 0.18    | <b>.67</b> |
| Media (N = 380) %                          | 45.5 (-2.3)  | 54.5 (2.3)   | 0.71    | <b>.40</b> |
| News (N = 108) %                           | 47.2 (-0.6)  | 52.8 (0.6)   | < 0.001 | <b>.98</b> |
| Social media (N = 272) %                   | 44.9 (-2.9)  | 55.1 (2.9)   | 0.84    | <b>.36</b> |
| <b>Zurich</b>                              |              |              |         |            |
| <b>City Census, 2015 (N = 343,379)</b>     | <b>49.5</b>  | <b>50.5</b>  | -       | -          |
| <b>Total Zurich (N = 1,329) %</b>          | 43.2 (-6.3)  | 56.8 (6.3)   | 20.68   | < .001     |
| Work (N = 487) %                           | 39.4 (-10.1) | 60.6 (10.1)  | 19.26   | < .001     |
| Word of mouth (N = 93) %                   | 50.5 (1.0)   | 49.5 (-1.0)  | 0.01    | <b>.92</b> |
| Other organizations (N = 178) %            | 42.7 (-6.8)  | 57.3 (6.8)   | 3.01    | <b>.08</b> |
| Project outreach activities (N = 185) %    | 43.2 (-6.3)  | 56.8 (6.3)   | 2.63    | <b>.10</b> |
| Media (N = 372) %                          | 46.8 (-2.7)  | 53.2 (2.7)   | 0.98    | <b>.32</b> |
| News (N = 134) %                           | 50.7 (1.2)   | 49.3 (-1.2)  | 0.04    | <b>.84</b> |
| Social media (N = 238) %                   | 44.5 (-5.0)  | 55.5 (5.0)   | 2.13    | <b>.14</b> |

<sup>a</sup> Deviation to census data (effect size)

<sup>b</sup> Pearson's Chi-squared test

<sup>c</sup> Category media combines news and social media into one category

<sup>d</sup> Sample size reached through public notice was only in Rome sufficient big
