# Supplementary material for: Evaluation of Different Recruitment Methods: Longitudinal, Web-Based, Pan-European Physical Activity Through Sustainable Transport Approaches (PASTA) Project
Source: PubMed Central journal article supplement (PMC6533046; doi:10.2196/11492), 2019-05-06
Supplement: jmir_v21i5e11492_app2.pdf [file jmir_v21i5e11492_app2.pdf]

## Appendix

**Table a: Demographic characteristic (age groups) by recruitment strategy of participants of Antwerp compared with City Census Data of Antwerp from 2017**

| Antwerp                                 | 20-29 (D <sup>a</sup> ) | 30-39 (D)            | 40-49 (D)            | 50-59 (D)            | 60+ (D)                       | chi-squared <sup>b</sup> | P      |
|-----------------------------------------|-------------------------|----------------------|----------------------|----------------------|-------------------------------|--------------------------|--------|
| <b>City Census (N = 393,975) %</b>      | <b>18.7</b>             | <b>20.2</b>          | <b>16.9</b>          | <b>15.4</b>          | <b>28.7</b>                   | -                        | -      |
| <b>Total Antwerp (N = 1,444) %</b>      | <b>13.2</b><br>(-5.5)   | <b>29.6</b><br>(9.4) | <b>24.4</b><br>(7.5) | <b>21.7</b><br>(6.3) | <b>11.0</b><br><b>(-17.7)</b> | 328.77                   | < .001 |
| Work (n = 376) %                        | 13.6<br>(-5.1)          | 33.0<br>(12.8)       | 28.2<br>(11.3)       | 21.0<br>(5.6)        | 4.3<br><b>(-24.4)</b>         | 149.95                   | < .001 |
| Word of mouth (n = 194) %               | 21.6<br>(2.9)           | 30.4<br>(10.2)       | 19.1<br>(2.2)        | 16.0<br>(0.6)        | 12.9<br><b>(-15.8)</b>        | 28.38                    | < .001 |
| Other organizations (n = 289) %         | 8.3<br>(-10.4)          | 27.3<br>(7.1)        | 24.6<br>(7.7)        | 23.9<br>(8.5)        | 15.9<br><b>(-12.8)</b>        | 63.91                    | < .001 |
| Project outreach activities (n = 132) % | 12.9<br>(-5.8)          | 31.1<br>(10.9)       | 18.2<br>(1.3)        | 29.5<br>(14.1)       | 8.3<br><b>(-20.4)</b>         | 46.33                    | < .001 |
| Media <sup>c</sup> (n = 409) %          | 12.5<br>(-6.2)          | 26.7<br>(6.5)        | 25.9<br>(9.0)        | 20.5<br>(5.1)        | 14.4<br><b>(-14.3)</b>        | 72.65                    | < .001 |
| News (n = 98) %                         | 8.2<br>(-10.5)          | 24.5<br>(4.3)        | 27.6<br>(10.7)       | 19.4<br>(4.0)        | 20.4<br>(-8.3)                | 16.68                    | .002   |
| Social media (n = 311) %                | 13.8<br>(-4.9)          | 27.3<br>(7.1)        | 25.4<br>(8.5)        | 20.9<br>(5.5)        | 12.5<br><b>(-16.2)</b>        | 59.49                    | < .001 |

<sup>a</sup> Deviation to census data (effect size)

<sup>b</sup> Person's Chi-squared test

<sup>c</sup> Category media combines news and social media into one category

**Table b: Demographic characteristics (age groups) by recruitment strategy of participants of Barcelona compared with City Census Data of Barcelona from 2016**

| Barcelona                               | 20-29 (D)      | 30-39 (D)      | 40-49 (D)      | 50-59 (D)      | 60+ (D)               | chi-squared | P      |
|-----------------------------------------|----------------|----------------|----------------|----------------|-----------------------|-------------|--------|
| <b>City Census (N = 1,339,223) %</b>    | <b>13.4</b>    | <b>20.0</b>    | <b>18.4</b>    | <b>15.7</b>    | <b>32.5</b>           | -           | -      |
| <b>Total Barcelona (N = 1,694) %</b>    | 30.0 (16.6)    | 32.1 (12.1)    | 19.4 (1.0)     | 12.6 (-3.1)    | 5.9 <b>(-26.6)</b>    | 851.36      | < .001 |
| Work (n = 198) %                        | 23.7 (10.3)    | 49.0 (29.0)    | 18.7 (0.3)     | 7.1 (-8.6)     | 1.5 <b>(-31.0)</b>    | 166.81      | < .001 |
| Word of mouth (n = 366) %               | 33.3 (19.9)    | 32.0 (12.0)    | 19.4 (1.0)     | 10.9 (-4.8)    | 4.4 <b>(-28.1)</b>    | 228.97      | < .001 |
| Other organizations (n = 105) %         | 32.4<br>(19.0) | 25.7<br>(5.7)  | 18.1<br>(-0.3) | 15.2<br>(-0.5) | 8.6<br><b>(-23.9)</b> | 48.386      | < .001 |
| Project outreach activities (n = 650) % | 30.2 (16.8)    | 27.7 (7.7)     | 17.8 (-0.6)    | 15.4 (-0.3)    | 8.9 <b>(-23.6)</b>    | 266.18      | < .001 |
| Media (n = 257) %                       | 23.0 (9.6)     | 38.9 (18.9)    | 23.7 (5.3)     | 10.9 (-4.8)    | 3.5 <b>(-29.0)</b>    | 137.65      | < .001 |
| News (n = 40) %                         | 22.5<br>(9.1)  | 37.5<br>(17.5) | 25.0<br>(6.6)  | 7.5<br>(-8.2)  | 7.5<br><b>(-25.0)</b> | 18.94       | < .001 |
| Social media (n = 217) %                | 23.0<br>(9.6)  | 39.2<br>(19.2) | 23.5<br>(5.1)  | 11.5<br>(-4.2) | 2.8<br><b>(-29.7)</b> | 119.39      | < .001 |

**Table c: Demographic characteristics (age groups) by recruitment strategy of participants of London compared with City Census Data of London from 2015**

| London                                  | 20-29 (D)   | 30-39 (D)   | 40-49 (D)   | 50-59 (D)   | 60+ (D)     | chi-squared | P      |
|-----------------------------------------|-------------|-------------|-------------|-------------|-------------|-------------|--------|
| <b>City Census (N = 6,533,667) %</b>    | <b>21.5</b> | <b>24.5</b> | <b>18.6</b> | <b>14.8</b> | <b>20.6</b> | -           | -      |
| <b>Total London (N = 1,431) %</b>       | 22.9 (1.4)  | 30.6 (6.1)  | 20.6 (2.0)  | 16.2 (1.4)  | 9.7 (-10.9) | 110.69      | < .001 |
| Work (n = 316) %                        | 23.1 (1.6)  | 33.9 (9.4)  | 21.5 (2.9)  | 16.1 (1.3)  | 5.4 (-15.2) | 49.15       | < .001 |
| Word of mouth (n = 140) %               | 32.9 (11.4) | 39.3 (14.8) | 17.9 (-0.7) | 5.7 (-9.1)  | 4.3 (-16.3) | 46.84       | < .001 |
| Other organizations (n = 281) %         | 13.5 (-8.0) | 28.5 (4.0)  | 20.3 (1.7)  | 24.2 (9.4)  | 13.5 (-7.1) | 34.38       | < .001 |
| Project outreach activities (n = 196) % | 33.2 (11.7) | 24.0 (-0.5) | 15.3 (-3.3) | 14.3 (-0.5) | 13.3 (-7.3) | 18.64       | < .001 |
| Media (n = 351) %                       | 18.5 (-3.0) | 28.2 (3.7)  | 25.4 (6.8)  | 15.4 (0.6)  | 12.5 (-8.1) | 23.21       | < .001 |
| News (n = 109) %                        | 12.8 (-8.7) | 31.2 (6.7)  | 25.7 (7.1)  | 16.5 (1.7)  | 13.8 (-6.8) | 11.46       | .02    |
| Social media (n = 242) %                | 21.1 (-0.4) | 26.9 (2.4)  | 25.2 (6.6)  | 14.9 (0.1)  | 12.0 (-8.6) | 14.95       | .005   |

**Table d: Demographic characteristics (age groups) by recruitment strategy of participants of Oerebro compared with City Census Data of Oerebro from 2016**

| Oerebro                                 | 20-29 (D)   | 30-39 (D)   | 40-49 (D)   | 50-59 (D)   | 60+ (D)      | chi-squared | P                |
|-----------------------------------------|-------------|-------------|-------------|-------------|--------------|-------------|------------------|
| <b>City Census (N = 112,173) %</b>      | <b>21.2</b> | <b>17.0</b> | <b>16.6</b> | <b>14.9</b> | <b>30.4</b>  | -           | -                |
| <b>Total Oerebro (N = 1,395) %</b>      | 18.6 (-2.6) | 20.4 (3.4)  | 19.5 (2.9)  | 19.9 (5.0)  | 21.6 (-8.8)  | 77.51       | < .001           |
| Work (n = 342) %                        | 9.9 (-11.3) | 21.9 (4.9)  | 22.8 (6.2)  | 27.8 (12.9) | 17.5 (-12.9) | 89.43       | < .001           |
| Word of mouth (n = 15) %                | 6.7 (-14.5) | 13.3 (-3.7) | 26.7 (10.1) | 33.3 (18.4) | 20.0 (-10.4) | 6.50        | .17 <sup>a</sup> |
| Other organizations (n = 36) %          | 25.0 (3.8)  | 16.7 (-0.3) | 38.9 (22.3) | 13.9 (-1.0) | 5.6 (-24.8)  | 18.32       | .001             |
| Project outreach activities (n = 547) % | 27.4 (6.2)  | 19.7 (2.7)  | 18.3 (1.7)  | 15.4 (0.5)  | 19.2 (-11.2) | 35.94       | < .001           |
| Media (n = 84) %                        | 4.8 (-16.4) | 13.1 (-3.9) | 15.5 (-1.1) | 26.2 (11.3) | 40.5 (10.1)  | 21.49       | < .001           |
| News (n = 51) %                         | 3.9 (-17.3) | 7.8 (-9.2)  | 19.6 (3.0)  | 27.5 (12.6) | 41.2 (10.8)  | 17.29       | .002             |
| Social media (n = 33) %                 | 6.1 (-15.1) | 21.2 (4.2)  | 9.1 (-7.5)  | 24.2 (9.3)  | 39.4 (9.0)   | 7.85        | .10 <sup>a</sup> |
| Random sampling (n = 360) %             | 16.1 (-5.1) | 22.2 (5.2)  | 17.5 (0.9)  | 17.5 (2.6)  | 26.7 (-3.7)  | 13.54       | .009             |

<sup>a</sup>Small sample size; chi-squared approximation might be incorrect

**Table e: Demographic characteristics (age groups) by recruitment strategy of participants of Rome compared with City Census Data of Rome from 2011**

| Rome                                    | 20-29 (D)   | 30-39 (D)   | 40-49 (D)   | 50-59 (D)   | 60+ (D)     | chi-squared | P      |
|-----------------------------------------|-------------|-------------|-------------|-------------|-------------|-------------|--------|
| <b>City Census (N = 2,150,368) %</b>    | <b>11.7</b> | <b>17.0</b> | <b>20.8</b> | <b>16.4</b> | <b>34.1</b> | -           | -      |
| <b>Total Rome (N = 1,836) %</b>         | 19.8 (8.1)  | 29.8 (12.8) | 25.5 (4.7)  | 20.3 (3.9)  | 4.5 (-29.6) | 787.67      | < .001 |
| Work (n = 337) %                        | 11.0 (-0.7) | 27.0 (10.0) | 27.6 (6.8)  | 27.0 (10.6) | 7.4 (-26.7) | 120.87      | < .001 |
| Word of mouth (n = 244) %               | 21.3 (9.6)  | 37.7 (20.7) | 22.1 (1.3)  | 16.4 (0.0)  | 2.5 (-31.6) | 152.48      | < .001 |
| Other organizations (n = 140) %         | 24.3 (12.6) | 22.1 (5.1)  | 26.4 (5.6)  | 23.6 (7.2)  | 3.6 (-30.5) | 65.92       | < .001 |
| Project outreach activities (n = 158) % | 26.6 (14.9) | 19.6 (2.6)  | 24.7 (3.9)  | 25.9 (9.5)  | 3.2 (-30.9) | 84.80       | < .001 |

|                                           |             |             |             |             |             |        |        |
|-------------------------------------------|-------------|-------------|-------------|-------------|-------------|--------|--------|
| Media (n = 780) %                         | 18.5 (6.8)  | 35.0 (18.0) | 26.2 (5.4)  | 16.2 (-0.2) | 4.2 (-29.9) | 393.65 | < .001 |
| News (N = 248) %                          | 19.4 (7.7)  | 28.6 (11.6) | 27.8 (7.0)  | 19.0 (2.6)  | 5.2 (-28.9) | 99.57  | < .001 |
| Social media (N = 89) %                   | 18.0 (6.3)  | 38.0 (21.0) | 25.4 (4.6)  | 14.8 (-1.6) | 3.8 (-30.3) | 305.37 | < .001 |
| Public notice <sup>a</sup><br>(N = 532) % | 49.4 (37.7) | 11.2 (5.8)  | 15.7 (-5.1) | 15.7 (-0.7) | 7.9 (-26.2) | 129.13 | < .001 |

<sup>a</sup> Sample size reached through public notice was only in Rome sufficient big

**Table f: Demographic characteristics (age groups) by recruitment strategy of participants of Vienna compared with City Census Data of Vienna from 2016**

| Vienna                                     | 20-29 (D)      | 30-39 (D)     | 40-49 (D)      | 50-59 (D)     | 60+ (D)        | chi-squared | P      |
|--------------------------------------------|----------------|---------------|----------------|---------------|----------------|-------------|--------|
| <b>City Census<br/>(N = 1,486,591) %</b>   | <b>19.6</b>    | <b>19.0</b>   | <b>18.1</b>    | <b>16.6</b>   | <b>26.7</b>    | -           | -      |
| <b>Total Vienna<br/>(N = 1,461) %</b>      | 27.3 (7.7)     | 27.7 (8.7)    | 19.8 (1.7)     | 16.9 (0.3)    | 8.4 (-18.3)    | 288.11      | < .001 |
| Work (N = 230) %                           | 21.3 (1.7)     | 34.8 (15.8)   | 27.4 (9.3)     | 14.8 (-1.8)   | 1.7 (-25.0)    | 95.47       | < .001 |
| Word of mouth<br>(N = 154) %               | 31.2 (11.6)    | 40.9 (21.9)   | 13.0 (-5.1)    | 10.4 (-6.2)   | 4.5 (-22.2)    | 83.64       | < .001 |
| Other organizations<br>(N = 314) %         | 24.2 (4.6)     | 27.1 (8.1)    | 17.8 (-0.3)    | 19.7 (3.1)    | 11.1 (-15.6)   | 44.38       | < .001 |
| Project outreach<br>activities (N = 327) % | 29.4 (9.8)     | 21.7 (2.7)    | 21.4 (3.3)     | 18.0 (1.4)    | 9.5 (-17.2)    | 55.77       | < .001 |
| Media (N = 380) %                          | 28.9 (9.3)     | 24.5 (5.5)    | 19.2 (1.1)     | 17.9 (1.3)    | 9.5 (-17.2)    | 65.75       | < .001 |
| News (N = 108) %                           | 26.9<br>(7.3)  | 18.5<br>(0.5) | 16.7<br>(-1.4) | 19.4<br>(2.8) | 18.5<br>(-8.2) | 6.25        | .18    |
| Social media (N = 272) %                   | 29.8<br>(10.2) | 26.8<br>(7.8) | 20.2<br>(2.1)  | 17.3<br>(0.7) | 5.9<br>(-20.8) | 68.04       | < .001 |

**Table g: Demographic characteristics (age groups) by recruitment strategy of participants of Zurich compared with City Census Data of Zurich from 2015**

| Zurich                                     | 20-29 (D)     | 30-39 (D)     | 40-49 (D)     | 50-59 (D)     | 60+ (D)         | chi-squared | P      |
|--------------------------------------------|---------------|---------------|---------------|---------------|-----------------|-------------|--------|
| <b>City Census<br/>(N = 343,379) %</b>     | <b>20.1</b>   | <b>25.1</b>   | <b>17.9</b>   | <b>13.8</b>   | <b>23.1</b>     | -           | -      |
| <b>Total Zurich<br/>(N = 1,329) %</b>      | 21.7<br>(1.6) | 28.6<br>(3.5) | 21.7<br>(3.8) | 19.7<br>(5.9) | 8.2 (-14.9)     | 179.7       | < .001 |
| Work (N = 487) %                           | 17.9 (-2.2)   | 30.2 (5.1)    | 23.6 (5.7)    | 22.6 (8.8)    | 5.7 (-17.4)     | 105.41      | < .001 |
| Word of mouth<br>(N = 93) %                | 24.7 (4.6)    | 29.0 (3.9)    | 21.5 (3.6)    | 11.8 (-2.0)   | 12.9<br>(-10.2) | 6.70        | .15    |
| Other organizations<br>(N = 178) %         | 13.5 (-6.6)   | 28.1 (3.0)    | 24.7 (6.8)    | 27.5 (13.7)   | 6.2 (-16.9)     | 55.26       | < .001 |
| Project outreach<br>activities (N = 185) % | 28.1 (8.0)    | 27.0 (1.9)    | 11.4 (-6.5)   | 17.3 (3.5)    | 16.2 (-6.9)     | 16.04       | < .001 |
| Media (N = 372) %                          | 26.3 (6.2)    | 27.4 (2.3)    | 23.7 (5.8)    | 15.6 (1.8)    | 7.0 (-16.1)     | 57.50       | < .001 |
| News (N = 134) %                           | 20.9 (0.8)    | 21.6 (-3.5)   | 27.6 (9.7)    | 17.2 (3.4)    | 12.7 (-0.4)     | 15.07       | .005   |
| Social media (N = 238) %                   | 29.4 (9.3)    | 30.7 (5.6)    | 21.4 (3.5)    | 14.7 (0.9)    | 3.8 (-19.3)     | 53.48       | < .001 |
